# Supplementary material
Source: MDPI journal article supplement (https://www.mdpi.com/2073-4433/12/9/1229)
Supplement: s1 [file s1 › atmosphere-1387420-supplementary.pdf]

## ***Supplementary Material***

### **1. Supplementary Tables**

**Table S1.** Classification of enrichment factor (EF) and potential ecological risk factor ( $E_r^i$ ) for each element and potential ecological risk index (PER).

**Table S2.** Key parameters for the health risk assessment through three pathways used in this study (USEPA, 2011;2016, Zhou et al., 2015; Adamiec, 2017).

### **2. Supplementary Figure**

**Figure S1.** Spatial distribution of potentially toxic elements in PM<sub>10</sub> of road dust in this study.

**Figure S2.** Plots of concentrations and isotopic values of Cu, Zn, and Pb (a: this study, b: Jeong et al., 2021).

**Table S1.** Classification of enrichment factor (EF) and potential ecological risk factor ( $E_r^i$ ) for each element and potential ecological risk index (PER).

| Enrichment factor |                     | Potential ecological risk |             |                   |
|-------------------|---------------------|---------------------------|-------------|-------------------|
| EF                | Classification      | $E_r^i$                   | PER         | Classification    |
| EF<2              | Unpolluted          | $E_r^i<40$                | PER<150     | Low risk          |
| 2<EF<4            | Slightly polluted   | $40<E_r^i<80$             | 150<PER<300 | Moderate risk     |
| 4<EF<16           | Moderately polluted | $80<E_r^i<160$            | 300<PER<600 | Considerable risk |
| 16<EF<32          | Strongly polluted   | $160<E_r^i<320$           |             | High risk         |
| EF>32             | Extremely polluted  | $E_r^i>320$               | PER>600     | Extreme risk      |

**Table S2.** Key parameters for the health risk assessment through three pathways used in this study (USEPA, 2011;2016, Zhou et al., 2015; Adamiec, 2017).

| Parameters | Description              | Units                                 | Value for Children    | Value for adult       |
|------------|--------------------------|---------------------------------------|-----------------------|-----------------------|
| IngR       | Ingestion rate           | mg day <sup>-1</sup>                  | 100                   | 50                    |
| EF         | Exposure frequency       | days                                  | 180                   | 180                   |
| ED         | Exposure duration        | years                                 | 6                     | 24                    |
| BW         | Average body weight      | kg                                    | 15                    | 70                    |
| AT         | Average time             | days year <sup>-1</sup>               | 6×365                 | 24×365                |
| InhR       | Inhalation rate          | m <sup>3</sup> day <sup>-1</sup>      | 10                    | 20                    |
| PEF        | Particle emission factor | m <sup>3</sup> kg <sup>-1</sup>       | 1.316×10 <sup>9</sup> | 1.316×10 <sup>9</sup> |
| SA         | Exposed skin area        | cm <sup>2</sup>                       | 2800                  | 5700                  |
| SL         | Skin adherence factor    | mg cm <sup>-2</sup> day <sup>-1</sup> | 0.2                   | 0.2                   |
| ABS        | Dermal absorption factor |                                       | 10 <sup>-3</sup>      | 10 <sup>-3</sup>      |

Adamiec, E., 2017. Road environments: Impact of metals on human health in heavily congested cities of Poland. *Int. J. Environ. Res. Public Health*, 14, 1-17.

U.S. Environmental Protection Agency. 2016. Regional Screening Levels (RSLs)—Generic Tables (May 2016).

Zhou, Q. et al. 2015. Residents health risk of Pb, Cd and Cu exposure to street dust based on different particle sizes around zinc smelting plant Northeast of China. *Environ. Geochem. Health* 37, 207-220.

U.S. Environmental Protection Agency. 2011. Exposure Factors Handbook 2011 Edition (Final), Washington, DC, EPA/600/R-09/052F.

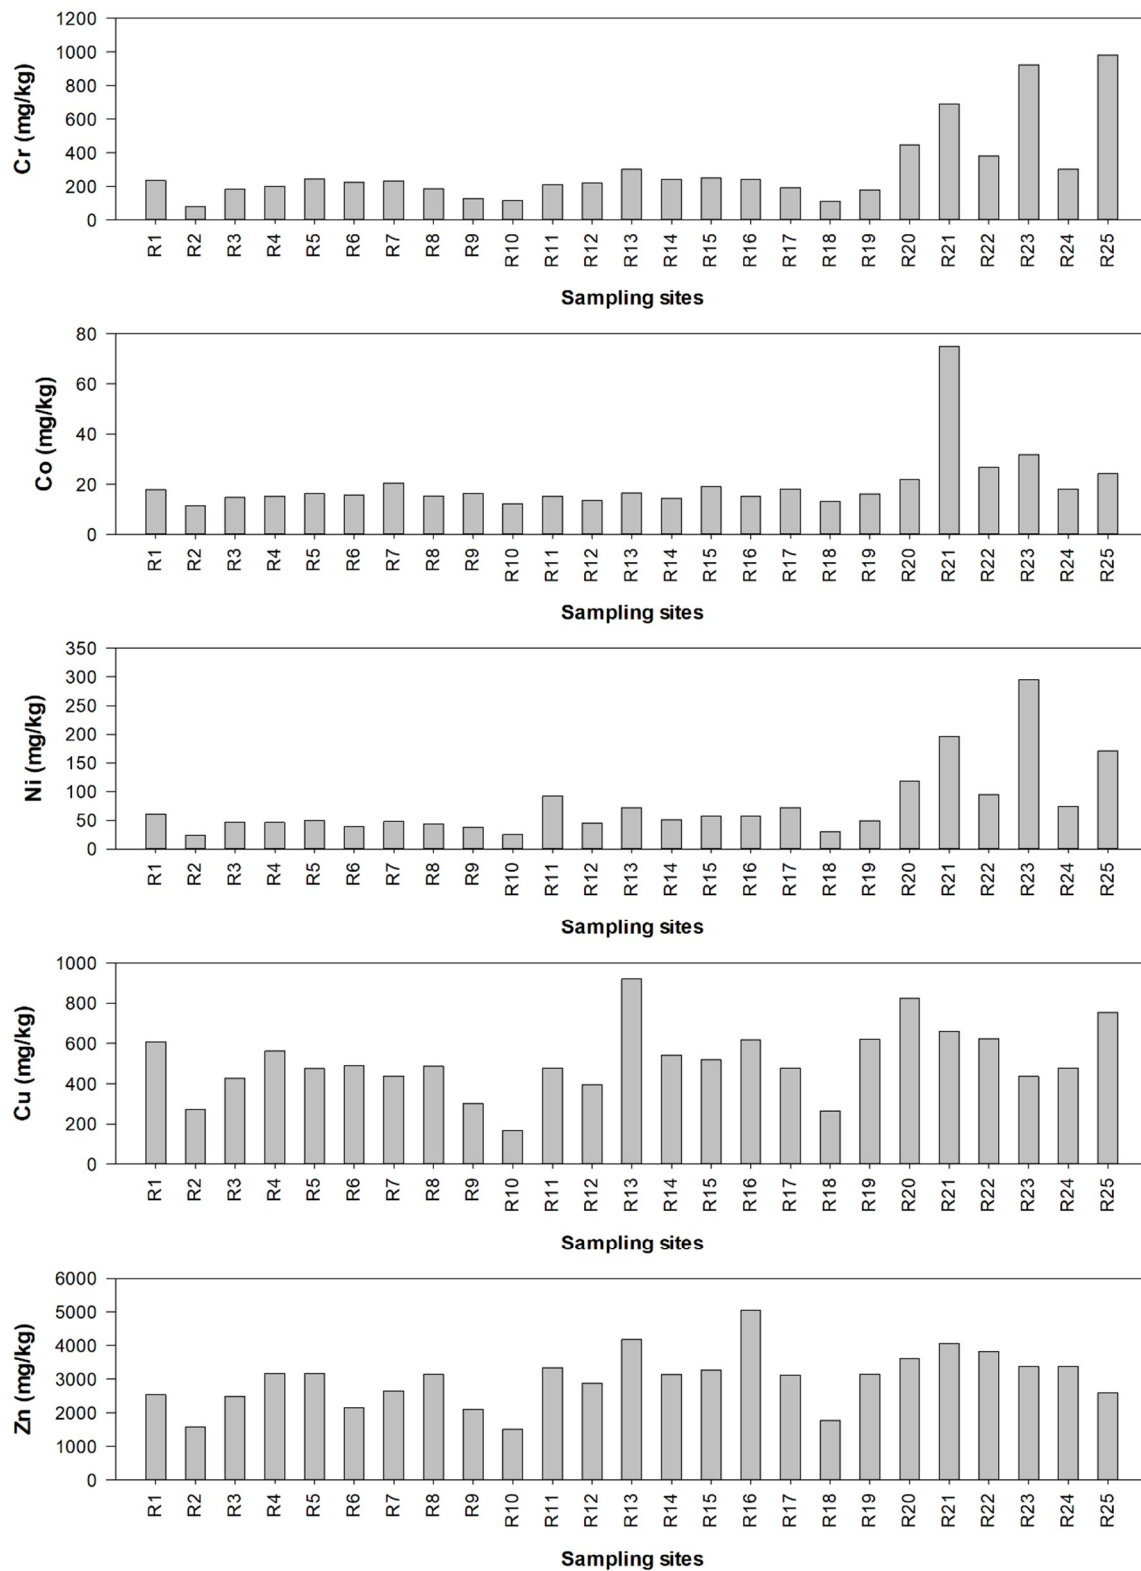

**Figure S1.** Spatial distribution of potentially toxic elements in  $PM_{10}$  of road dust in this study.

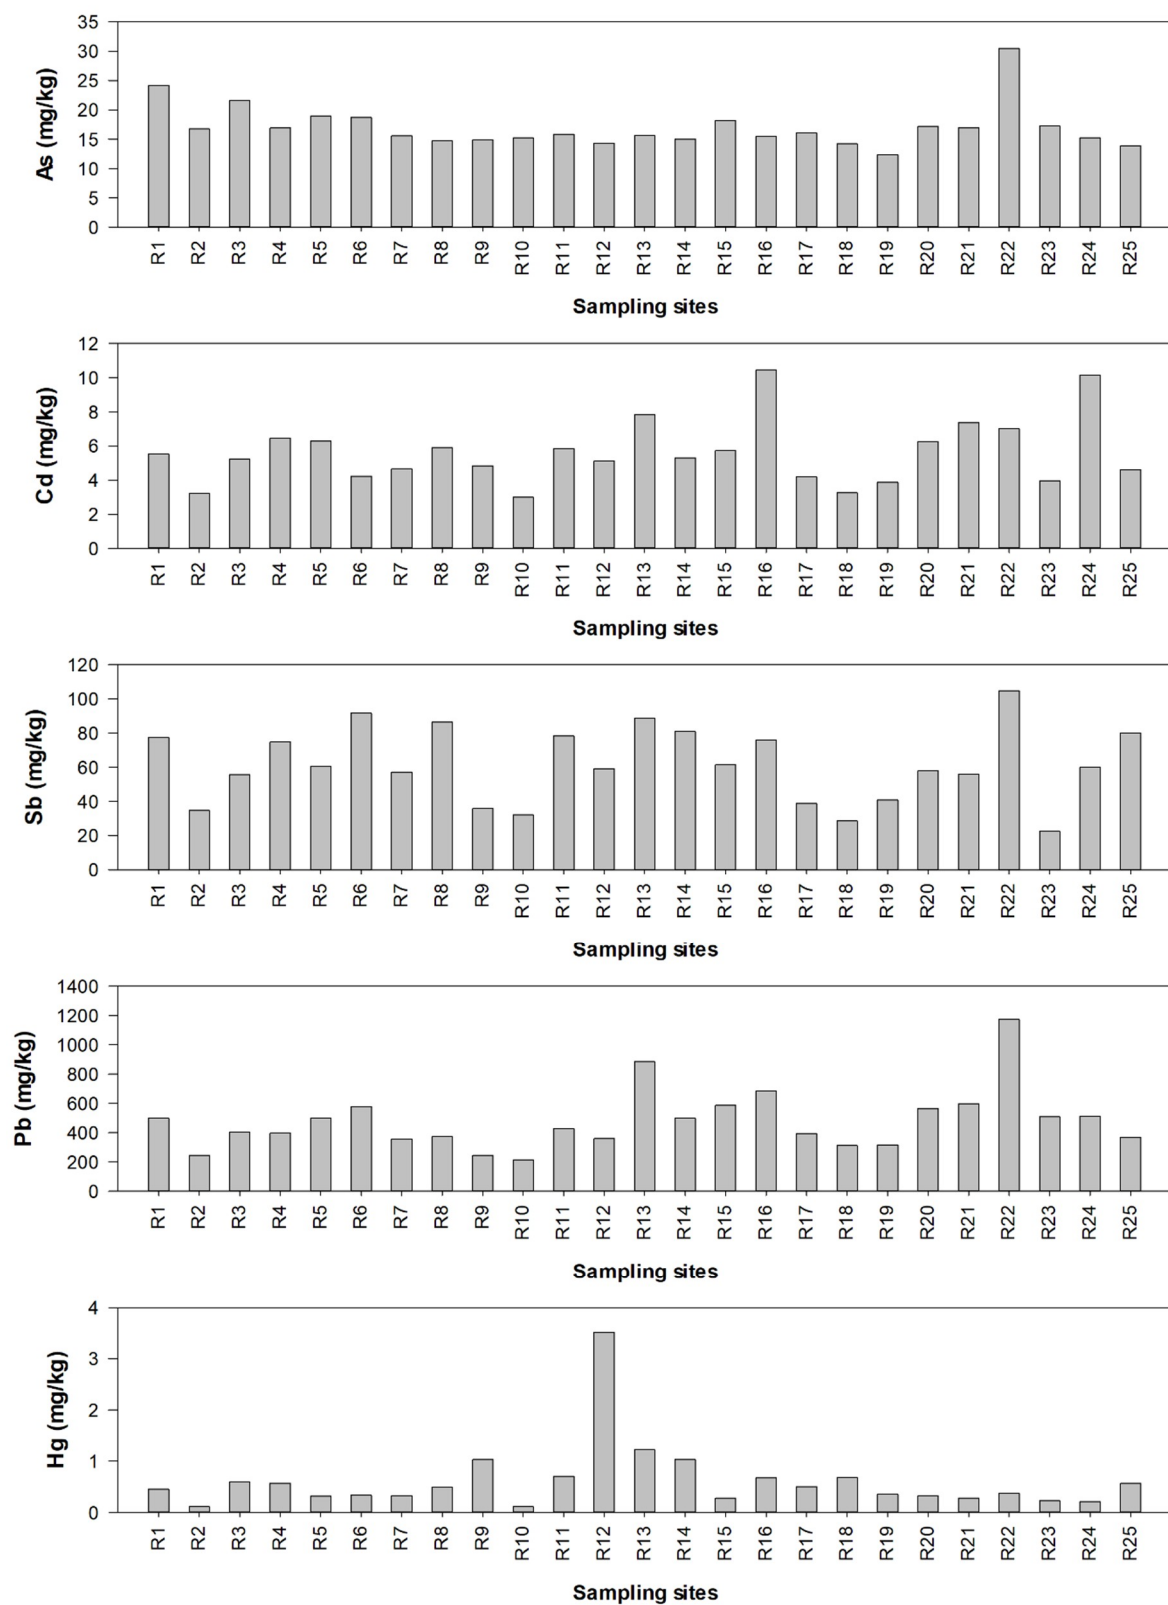

Figure S2. Continued.

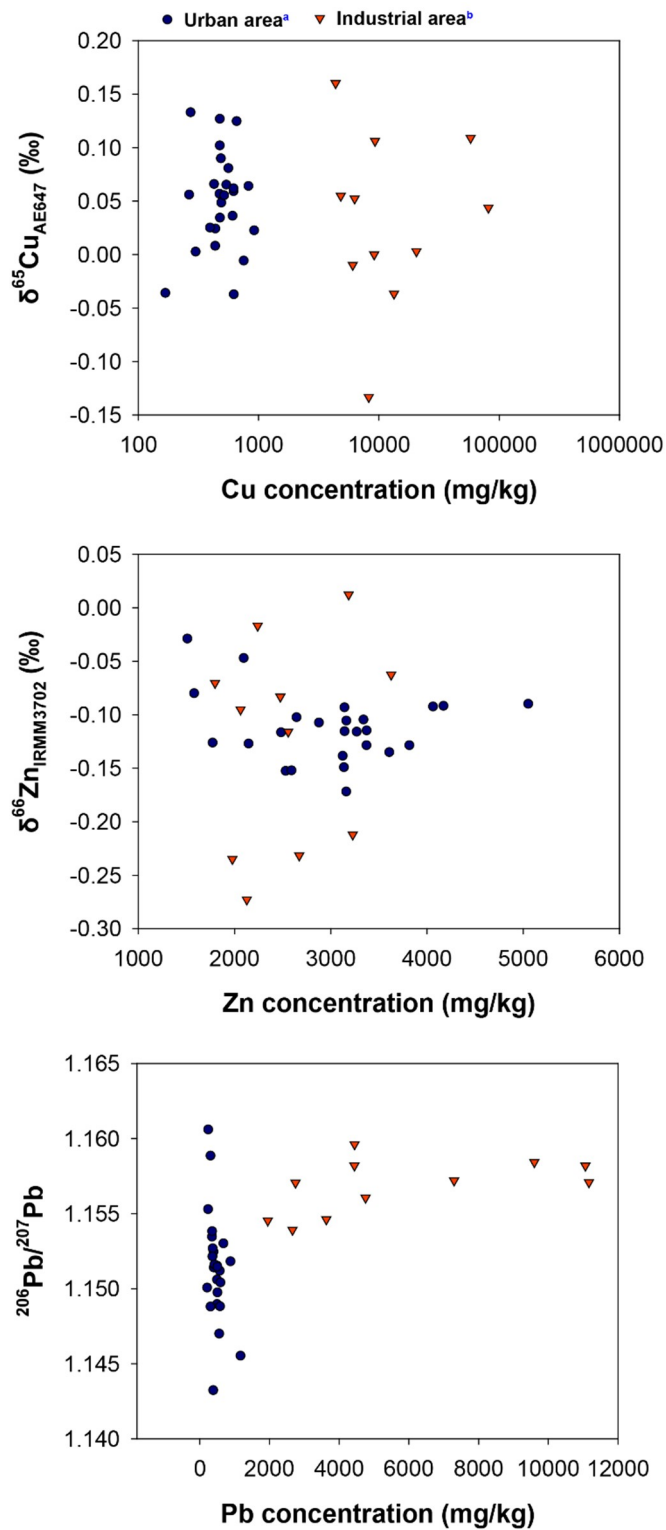

**Figure S2.** Plots of concentrations and isotopic values of Cu, Zn, and Pb (a: this study, b: Jeong et al., 2021).

Jeong, H.; Ra, K. Multi-isotope signatures (Cu, Zn, Pb) of different particle sizes in road-deposited sediments: a case study from industrial area. *J. Anal. Sci. Technol.* 2021, 12, 39.
